# Supplementary material for: PamR, a new MarR-like regulator affecting prophages and metabolic genes expression in Bacillus subtilis
Source: PubMed Central journal article supplement (PMC5730154; doi:10.1371/journal.pone.0189694), 2017-12-14

Fig S2 de San Eustaquio et al.

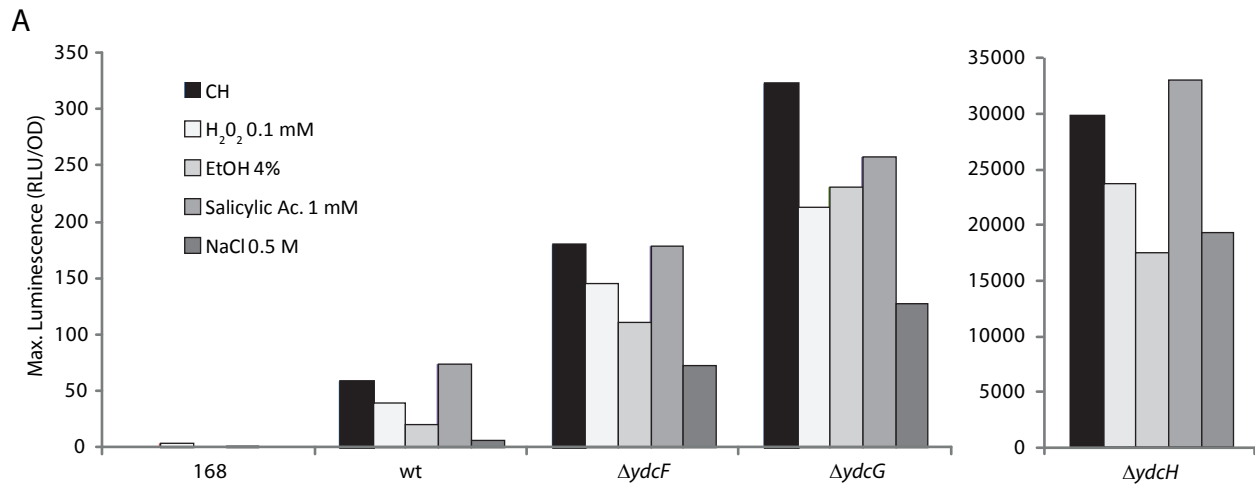

Supplement: pone.0189694.s002.pdf [file pone.0189694.s002.pdf]
