# Supplementary material for: PamR, a new MarR-like regulator affecting prophages and metabolic genes expression in Bacillus subtilis
Source: PubMed Central journal article supplement (PMC5730154; doi:10.1371/journal.pone.0189694), 2017-12-14
Supplement: pone.0189694.s003.pdf [file pone.0189694.s003.pdf]

**TABLE S1. Strains used in this study**

| name                 | relevant genotype                                                                                                                   | construction or reference |
|----------------------|-------------------------------------------------------------------------------------------------------------------------------------|---------------------------|
| <i>E. coli</i> :     |                                                                                                                                     |                           |
| DH5a                 | <i>F- endA1 glnV44 thi-1 recA1 relA1 gyrA96 deoR nupG Φ80dlacZΔM15 Δ(lacZYA-argF)U169, hsdR17(rK- mK+), λ-</i>                      | stock collection          |
| BL21                 | <i>F- λ- fhuA2 [lon] ompT lacZ::T7 gal sulA11 Δ(mcrC-mrr)114::IS10 R(mcr-73::miniTn10-Tets)2 R(zgb-210::Tn10)(Tets) endA1 [dcm]</i> | stock collection          |
| EC.ASEC19            | pET(P <sub>17</sub> <i>his-ydcH, lacI, kan</i> )                                                                                    | pET_ydcH_H-Nt ->DH5a      |
| <i>B. subtilis</i> : |                                                                                                                                     |                           |
| 168                  | wild type "168-Oxford" (24 variations with GenBank AL009126.3)                                                                      | stock collection          |
| RCL78                | <i>Δmbl::cm</i>                                                                                                                     | (1)                       |
| 3725                 | <i>neo-ΔmreB</i>                                                                                                                    | (2)                       |
| ABS1761              | <i>amyE::P<sub>ydc1</sub> lacZ-spc</i>                                                                                              | pAC769 -> 168             |
| ABS1763              | <i>amyE::P<sub>ydc2</sub> lacZ-spc</i>                                                                                              | pAC772 -> 168             |
| ABS1765              | <i>amyE::P<sub>ydc1-2</sub> lacZ-spc</i>                                                                                            | pAC775 -> 168             |
| ABS1767              | <i>amyE::P<sub>ydc0</sub> lacZ-spc</i>                                                                                              | pAC778 -> 168             |
| ABS1762              | <i>amyE::P<sub>ydc1</sub> lacZ-spc ; neo-ΔmreB</i>                                                                                  | pAC769 -> 3725            |
| ABS1769              | <i>amyE::P<sub>ydc1</sub> lacZ-spc ; Δmbl::cm</i>                                                                                   | RCL78 -> ABS1761          |
| ABS1381              | <i>ΔydcH::spc</i>                                                                                                                   | LFH PCR -> 168            |
| ABS1798              | <i>ΔydcH::spc::erm</i>                                                                                                              | pQP1 -> ABS1381           |
| ABS1820              | <i>ΔydcH::spc::erm ; amyE::P<sub>ydc1</sub> lacZ-spc</i>                                                                            | pAC769 -> ABS1798         |
| ABS1821              | <i>ΔydcH::spc::erm ; amyE::P<sub>ydc2</sub> lacZ-spc</i>                                                                            | pAC772 -> ABS1798         |
| ABS1822              | <i>ΔydcH::spc::erm ; amyE::P<sub>ydc1-2</sub> lacZ-spc</i>                                                                          | pAC775 -> ABS1798         |
| ABS1823              | <i>ΔydcH::spc::erm ; amyE::P<sub>ydc0</sub> lacZ-spc</i>                                                                            | pAC778 -> ABS1798         |
| BKE04750             | <i>ΔydcF::erm</i>                                                                                                                   | BKE collection (BGSC)     |
| BKE04760             | <i>ΔydcG::erm</i>                                                                                                                   | BKE collection (BGSC)     |
| BKE04770             | <i>ΔydcH::erm</i>                                                                                                                   | BKE collection (BGSC)     |
| ASEC275              | <i>ΔydcF::erm</i>                                                                                                                   | BKE4750 -> 168            |
| ASEC277              | <i>ΔydcG::erm</i>                                                                                                                   | BKE4760 -> 168            |
| ASEC279              | <i>ΔydcH::erm</i>                                                                                                                   | BKE4770 -> 168            |
| ASEC287              | <i>ΔydcF*</i>                                                                                                                       | pDR244 -> ASEC275         |
| ASEC289              | <i>ΔydcG*</i>                                                                                                                       | pDR244 -> ASEC277         |
| ASEC333              | <i>ΔydcF* ; amyE::P<sub>ydc2</sub> lacZ-spc</i>                                                                                     | ABS1763 -> ASEC287        |
| ASEC335              | <i>ΔydcG* ; amyE::P<sub>ydc2</sub> lacZ-spc</i>                                                                                     | ABS1763 -> ASEC289        |
| ABS2057              | <i>sacA::Km</i>                                                                                                                     | pSac-Kan -> 168           |
| ABS2084              | <i>sacA::km::P<sub>ydc1</sub> lacZ-cm</i>                                                                                           | pAC826 -> ABS2057         |
| ASEC281              | <i>ΔydcF::erm ; sacA::km::P<sub>ydc1</sub> lacZ-cm</i>                                                                              | BKE04750 -> ABS2084       |
| ASEC283              | <i>ΔydcG::erm ; sacA::km::P<sub>ydc1</sub> lacZ-cm</i>                                                                              | BKE04760 -> ABS2084       |
| ASEC297              | <i>ΔydcF* ; sacA::km::P<sub>ydc1</sub> lacZ-cm</i>                                                                                  | pDR244 -> ASEC281         |
| ASEC301              | <i>ΔydcG* ; sacA::km::P<sub>ydc1</sub> lacZ-cm</i>                                                                                  | pDR244 -> ASEC283         |
| ABS2005              | <i>sacA::P<sub>ydc1s</sub> luxABCDE-cm</i>                                                                                          | pAC834 -> 168             |
| ASEC311              | <i>ΔydcF::erm ; sacA::P<sub>ydc1s</sub> luxABCDE-cm</i>                                                                             | ASEC275 -> ABS2005        |
| ASEC313              | <i>ΔydcG::erm ; sacA::P<sub>ydc1s</sub> luxABCDE-cm</i>                                                                             | ASEC277 -> ABS2005        |
| ASEC315              | <i>ΔydcH::erm ; sacA::P<sub>ydc1s</sub> luxABCDE-cm</i>                                                                             | ASEC279 -> ABS2005        |
| ASEC325              | <i>ΔydcF* ; sacA::P<sub>ydc1s</sub> luxABCDE-cm</i>                                                                                 | pDR244 -> ASEC311         |
| ASEC327              | <i>ΔydcG* ; sacA::P<sub>ydc1s</sub> luxABCDE-cm</i>                                                                                 | pDR244 -> ASEC313         |
| ASEC329              | <i>ΔydcH* ; sacA::P<sub>ydc1s</sub> luxABCDE-cm</i>                                                                                 | pDR244 -> ASEC315         |
| ASEC56               | <i>ΔydcH::spc ; sacA::P<sub>ydc1s</sub> luxABCDE-cm</i>                                                                             | ABS2005 -> ABS1381        |

\* stands for markerless deletion
