# Supplementary material for: PamR, a new MarR-like regulator affecting prophages and metabolic genes expression in Bacillus subtilis
Source: PubMed Central journal article supplement (PMC5730154; doi:10.1371/journal.pone.0189694), 2017-12-14
Supplement: pone.0189694.s004.pdf [file pone.0189694.s004.pdf]

**TABLE S2. Plasmids used in this study**

| Plasmid name   | relevant information                                                                                                   | construction or reference |
|----------------|------------------------------------------------------------------------------------------------------------------------|---------------------------|
| pET28a         | vector for protein expression with a T7 IPTG-inducible promoter                                                        | Novagen                   |
| pET_ydcH_6H-Nt | vector for Histidine-tagged YdcH expression and purification                                                           | PCR(ac1240-41) -> pET28a  |
| pDR244         | vector with ts ori, expressing cre recombinase allowing excision of <i>erm</i> cassette in BKE strains                 | (3)                       |
| pQP1           | plasmid allowing deletion/replacement of the <i>spc</i> resistance cassette by <i>ery</i>                              | laboratory stock          |
| pSac-Kan       | plasmid allowing introduction of a kanamycin cassette at the <i>sacA</i> locus                                         | (4)                       |
| pSac-Cm        | plasmid allowing introduction of a chloramphenicol cassette at the <i>sacA</i> locus                                   | (4)                       |
| pDG1728        | suicide vector for integration of transcriptional fusions to <i>lacZ</i> (and <i>spc</i> ) at the <i>amyE</i> locus    | (5)                       |
| pDG1663        | suicide vector for integration of transcriptional fusions to <i>lacZ</i> (and <i>erm</i> ) at the <i>thrC</i> locus    | (5)                       |
| pAH328         | suicide vector for integration of transcriptional fusions to <i>luxABCDE</i> (and <i>cm</i> ) at the <i>sacA</i> locus | (6)                       |
| pAC769         | pDG1728 derivative for integration of P <sub>ydc1</sub> <i>lacZ</i> transcriptional fusion at <i>amyE</i>              | PCR(ac1240-41) -> pDG1728 |
| pAC772         | pDG1728 derivative for integration of P <sub>ydc2</sub> <i>lacZ</i> transcriptional fusion at <i>amyE</i>              | PCR(ac1243-42) -> pDG1728 |
| pAC775         | pDG1728 derivative for integration of P <sub>ydc1-2</sub> <i>lacZ</i> transcriptional fusion at <i>amyE</i>            | PCR(ac1240-42) -> pDG1728 |
| pAC778         | pDG1728 derivative for integration of P <sub>ydc0</sub> <i>lacZ</i> transcriptional fusion at <i>amyE</i>              | PCR(ac1243-41) -> pDG1728 |
| pAC826         | pSac-Cm derivative for integration of P <sub>ydc1</sub> <i>lacZ</i> transcriptional fusion at <i>sacA</i>              | PCR(ac1240-80) -> pSac-Cm |
| pAC834         | pAH328 derivative for integration of P <sub>ydc1s</sub> <i>luxABCDE</i> transcriptional fusion at <i>sacA</i>          | PCR(ac1240-87) -> pAH328  |
