# Supplementary material for: PamR, a new MarR-like regulator affecting prophages and metabolic genes expression in Bacillus subtilis
Source: PubMed Central journal article supplement (PMC5730154; doi:10.1371/journal.pone.0189694), 2017-12-14
Supplement: pone.0189694.s005.pdf [file pone.0189694.s005.pdf]

**TABLE S3. Oligonucleotides used in this study**

| name    | sequence (5' to 3')                                                     | usage                                                              |
|---------|-------------------------------------------------------------------------|--------------------------------------------------------------------|
| ac-1240 | GTAGAATTCGCTGAAAATGTATACGACATCGAG                                       | cloning P <sub>1</sub> or P <sub>1+2</sub> in front of <i>lacZ</i> |
| ac-1241 | GGAGGATCCCGTCGGCATGCTTTAGACAGT                                          | cloning P <sub>1</sub> or P <sub>0</sub> in front of <i>lacZ</i>   |
| ac-1242 | GGAGGATCCGGCAGCGCCTTTAATACATGTT                                         | cloning P <sub>2</sub> or P <sub>1+2</sub> in front of <i>lacZ</i> |
| ac-1243 | GAAGAATTCACCTATCATTCTGGGAGCTTATGGG                                      | cloning P <sub>2</sub> or P <sub>0</sub> in front of <i>lacZ</i>   |
| ac-1280 | ACAAGCTTAAAACTGGTCTGATCGATAG                                            | cloning P <sub>1</sub> in front of <i>lacZ</i> at <i>sacA</i>      |
| ac-1287 | ACTACTAGTAATCTGATGCAATACCCGTC                                           | cloning P <sub>1</sub> in front of <i>lux</i> at <i>sacA</i>       |
| ac-1052 | TCGGCGTTGTGTCAGAGCAACAT                                                 | LFH-PCR of <i>ydch</i> :: <i>spc</i> (replacement)                 |
| ac-1053 | CAATTCGCCCTATAGTGAGTCGTGGCTTGTGTTCCGGACCGCTAAA                          | "                                                                  |
| ac-1054 | CCAGCTTTTGTCCCTTATAGTAGTGTGAGCGGCTTACAGGAACATTGA                        | "                                                                  |
| ac-1055 | TTGCTTTTGGCGACTGTCGCCTT                                                 | "                                                                  |
| ac-1056 | GTGGGGAGAAATCATTGGGACTG                                                 | <i>ydch</i> locus sequencing                                       |
| ac-1057 | GAACACTTCTTTTCTTCGCTG                                                   | "                                                                  |
| asec-04 | GGA GGA TCC CCC GTA TCT TTA CTC ATG TT                                  | cloning <i>ydch</i> in pET28a                                      |
| asec-64 | CCA <sup>CC</sup> ATGGTCCATCATCATCATCATGGCGGTGGAATGGCACTCTAAATTTAGCGGTC | "                                                                  |
| ac-1385 | AATGTTCTCTCCGTTCC                                                       | EMSA, mutagenesis (reverse-dn)                                     |
| ac-1386 | GCGCAGAATAATATAGTCAACCGCAAA                                             | EMSA, mutagenesis (reverse-up)                                     |
| ac-1387 | TGCGGTTGACTATATTATTCTGCGCT                                              | EMSA, mutagenesis (forward-dn)                                     |
| ac-1390 | GATGAAAACAAAAGAGGCG                                                     | EMSA, mutagenesis (forward-up)                                     |
| ac-1391 | ACCTGACCTATATTCTCGG                                                     | EMSA, Cy-5 labelled                                                |
| ac-1392 | AATGTTCTCTCCGTTCC                                                       | "                                                                  |

**References:**

1. Billaudeau C, Chastanet A, Yao Z, Cornilleau C, Mirouze N, Fromion V, et al. Contrasting mechanisms of growth in two model rod-shaped bacteria. *Nature communications*. 2017;8:15370.
2. Formstone A, Errington J. A magnesium-dependent *mreB* null mutant: implications for the role of *mreB* in *Bacillus subtilis*. *Molecular microbiology*. 2005;55(6):1646-57.
3. Wang X, Montero Llopis P, Rudner DZ. *Bacillus subtilis* chromosome organization oscillates between two distinct patterns. *Proceedings of the National Academy of Sciences of the United States of America*. 2014;111(35):12877-82.
4. Middleton R, Hofmeister A. New shuttle vectors for ectopic insertion of genes into *Bacillus subtilis*. *Plasmid*. 2004;51(3):238-45.
5. Guerout-Fleury AM, Frandsen N, Stragier P. Plasmids for ectopic integration in *Bacillus subtilis*. *Gene*. 1996;180(1-2):57-61.
6. Chen Y, Cao S, Chai Y, Clardy J, Kolter R, Guo JH, et al. A *Bacillus subtilis* sensor kinase involved in triggering biofilm formation on the roots of tomato plants. *Molecular microbiology*. 2012;85(3):418-30.
