# Supplementary material for: PamR, a new MarR-like regulator affecting prophages and metabolic genes expression in Bacillus subtilis
Source: PubMed Central journal article supplement (PMC5730154; doi:10.1371/journal.pone.0189694), 2017-12-14
Supplement: pone.0189694.s006.pdf [file pone.0189694.s006.pdf]

**Table S4. Sequence variations detected in strain 3725**

| gene <sup>1</sup>                                                                                 | position <sup>2</sup> | variation type        | Ref. | Obs. | change <sup>3</sup><br>aminoacid | function                                                  | functional category             | essential                          |     |
|---------------------------------------------------------------------------------------------------|-----------------------|-----------------------|------|------|----------------------------------|-----------------------------------------------------------|---------------------------------|------------------------------------|-----|
| <b>Common variations to wild type and mutant strains (relative to the published 168 sequence)</b> |                       |                       |      |      |                                  |                                                           |                                 |                                    |     |
| <b>INTRAGENIC</b>                                                                                 |                       |                       |      |      |                                  |                                                           |                                 |                                    |     |
| <i>uvrX</i>                                                                                       | 2271523               | Non Synonymous Coding | A    | C    | D45E                             | UV DNA damage repair                                      | DNA repair                      | information processing             | no  |
| <i>rrnI-16S</i>                                                                                   | 161239                | untranslated region   | T    | TC   | NA                               | ribosomal RNA 16S                                         | translation                     | information processing             | no  |
| <i>trnI-asn</i>                                                                                   | 165825                | untranslated region   | G    | GC   | NA                               | transfer RNA-asn                                          | translation                     | information processing             | no  |
| <i>rrnG-16S</i>                                                                                   | 171679                | untranslated region   | TA   | T    | NA                               | ribosomal RNA 16S                                         | translation                     | information processing             | no  |
| <i>rrnB-16S</i>                                                                                   | 3178443               | untranslated region   | T    | C    | NA                               | ribosomal RNA 16S                                         | translation                     | information processing             | no  |
| <i>pstS</i> (5'UTR)                                                                               | 2581726               | untranslated region   | G    | GT   | NA                               | phosphate ABC transporter                                 | Phosphate metabolism            | Metabolism                         | no  |
| <i>ydcN</i> (5'UTR)                                                                               | 557865                | untranslated region   | G    | GT   | NA                               | unknown                                                   | unknown                         | unknown                            | no  |
| <i>yjpA</i> (3'UTR)                                                                               | 1317152               | untranslated region   | G    | GGT  | NA                               | unknown                                                   | unknown                         | unknown                            | no  |
| <i>yjpA</i> (3'UTR)                                                                               | 1317153               | untranslated region   | C    | CT   | NA                               | unknown                                                   | unknown                         | unknown                            | no  |
| <i>zwf</i> (ter)                                                                                  | 2480646               | untranslated region   | T    | A    | NA                               | glucose 6P deshydrogenase                                 | carbon metabolism               | Metabolism                         | no  |
| <i>zwf</i> (ter)                                                                                  | 2480647               | untranslated region   | A    | T    | NA                               | glucose 6P deshydrogenase                                 | carbon metabolism               | Metabolism                         | no  |
| <i>zwf</i> (ter)                                                                                  | 2480653               | untranslated region   | CT   | C    | NA                               | glucose 6P deshydrogenase                                 | carbon metabolism               | Metabolism                         | no  |
| <i>zwf</i> (ter)                                                                                  | 2480666               | untranslated region   | GT   | G    | NA                               | glucose 6P deshydrogenase                                 | carbon metabolism               | Metabolism                         | no  |
| <i>ywbD</i> (ter)                                                                                 | 3935822               | untranslated region   | AT   | A    | NA                               | unknown                                                   | unknown                         | unknown                            | no  |
| <b>synonymous codon (silent)</b>                                                                  |                       |                       |      |      |                                  |                                                           |                                 |                                    |     |
| <i>uvrX</i>                                                                                       | 2271424               | Synonymous coding     | T    | C    | R78                              | UV DNA damage repair                                      | DNA repair                      | information processing             | no  |
| <i>uvrX</i>                                                                                       | 2271505               | Synonymous coding     | C    | T    | V51                              | UV DNA damage repair                                      | DNA repair                      | information processing             | no  |
| <b>INTERGENIC</b>                                                                                 |                       |                       |      |      |                                  |                                                           |                                 |                                    |     |
| <i>int</i> (up <i>trnI-asn</i> )                                                                  | 165748                | untranslated region   | TC   | T    | NA                               | transfer RNA-asn                                          | translation                     | information processing             | no  |
| <i>int</i> (up <i>trnI-asn</i> )                                                                  | 165750                | untranslated region   | TC   | T    | NA                               | transfer RNA-asn                                          | translation                     | information processing             | no  |
| <i>int</i> (dn <i>trnI-gly</i> )                                                                  | 166037                | untranslated region   | A    | AT   | NA                               | transfer RNA-gly                                          | translation                     | information processing             | no  |
| <i>int</i> (dn <i>trnI-ala</i> )                                                                  | 166343                | untranslated region   | AG   | A    | NA                               | transfer RNA-ala                                          | translation                     | information processing             | no  |
| <i>int</i> ( <i>s1555/purA</i> )                                                                  | 4155390               | untranslated region   | C    | CA   | NA                               | tRNA-lys/adenylosuccinate synthetase                      | translation/purine acquisition  | information processing/Metabolism  | no  |
| <i>int</i> ( <i>s1555/azoR1</i> )                                                                 | 2097080               | untranslated region   | C    | CA   | NA                               | ethanol response/azoreductase                             | stress response/stress response | Lifestyle/Lifestyle                | no  |
| <i>s1417</i>                                                                                      | 3770058               | untranslated region   | G    | GAAA | NA                               | unknown                                                   | unknown                         | unknown                            | no  |
| <i>int</i> ( <i>ydgF/dinB</i> )                                                                   | 608214                | untranslated region   | G    | GA   | NA                               | unknown/nuclease inhibitor                                | unknown/DNA repair              | unknown/inhibitor processing       | no  |
| <b>Variations in <i>ΔmreB</i> 3725 relative to its parental wild type 168 strain</b>              |                       |                       |      |      |                                  |                                                           |                                 |                                    |     |
| <b>Variations in strain 3725 also reported in strain PDC134</b>                                   |                       |                       |      |      |                                  |                                                           |                                 |                                    |     |
| <b>INTRAGENIC</b>                                                                                 |                       |                       |      |      |                                  |                                                           |                                 |                                    |     |
| <i>sepF</i>                                                                                       | 1610896               | Non Synonymous Coding | T    | C    | M11T                             | recruits cell division FtsZ protein to membrane           | Cell division                   | cellular process                   | no  |
| <i>walR</i>                                                                                       | 4153797               | Non Synonymous Coding | G    | A    | R203C                            | two component response regulator                          | CW homeostasis                  | cellular process                   | YES |
| <i>ytpS</i> (=sftA)                                                                               | 3051461               | Non Synonymous Coding | G    | A    | P375S                            | DNA translocase (paralog of SpoIIIE)                      | DNA segregation                 | information processing             | no  |
| <i>epsC</i>                                                                                       | 3527377               | Non Synonymous Coding | G    | A    | A276V                            | udp-sugar epimerase (inactive in 168)                     | biofilm                         | Lifestyle                          | no  |
| <i>comP</i>                                                                                       | 3253956               | Non Synonymous Coding | T    | C    | E628G                            | two component sensor kinase, snsing ComX                  | competence and sporulation      | Lifestyle                          | no  |
| <i>sigI</i>                                                                                       | 1412484               | Non Synonymous Coding | T    | G    | L198R                            | alternative sigma factor                                  | stress response                 | Lifestyle                          | no  |
| <i>bscR</i> (=FatR)                                                                               | 2777176               | Non Synonymous Coding | A    | C    | I160R                            | Transcriptional repressor of <i>fatR-yrhJ</i> operon      | Fatty acid metabolism           | Metabolism                         | no  |
| <i>ymfD</i>                                                                                       | 1756603               | Non Synonymous Coding | G    | A    | A319T                            | baicillibactin exporter                                   | iron acquisition                | Metabolism                         | no  |
| <i>mmgA</i>                                                                                       | 2513699               | Non Synonymous Coding | A    | C    | M115R                            | degradative acetoacetyl-CoA thiolase                      | Leucine metabolism              | Metabolism                         | no  |
| <i>yuxG</i> (=rahEW)                                                                              | 3202213               | Non Synonymous Coding | C    | T    | G573R                            | bifunctional rhamnulose-P aldolase/lactate deshydrogenase | Rhamnose catabolism             | Metabolism                         | no  |
| <i>ydcH</i>                                                                                       | 525386                | indel: Frame Shift    | CA   | C    | frame shift                      | unknown                                                   | unknown                         | unknown                            | no  |
| <i>yhgE</i>                                                                                       | 1091083               | Non Synonymous Coding | G    | A    | G228E                            | unknown                                                   | unknown                         | unknown                            | no  |
| <i>yisQ</i> & <i>S389</i>                                                                         | 1161993               | Non Synonymous Coding | C    | T    | D51N                             | unknown                                                   | unknown                         | unknown                            | no  |
| <i>yjcM</i> & <i>S430</i>                                                                         | 1264284               | Non Synonymous Coding | T    | A    | K216N                            | unknown                                                   | unknown                         | unknown                            | no  |
| <i>BSU_misc_RNA_20</i>                                                                            | 1424639               | untranslated region   | T    | G    | NA                               | unknown; coexpressed with MtnK (methionine salvage)       | unknown                         | unknown                            | no  |
| <i>panE</i>                                                                                       | 1514277               | Non Synonymous Coding | G    | A    | A76T                             | unknown; putative ketopentolate reductase                 | unknown                         | unknown                            | no  |
| <i>BSU_misc_RNA_28</i>                                                                            | 1620435               | untranslated region   | GT   | G    | NA                               | unknown                                                   | unknown                         | unknown                            | no  |
| <i>yxbD</i>                                                                                       | 4095811               | Non Synonymous Coding | C    | T    | V9I                              | unknown                                                   | unknown                         | unknown                            | no  |
| <b>INTERGENIC</b>                                                                                 |                       |                       |      |      |                                  |                                                           |                                 |                                    |     |
| <i>s1123</i> (5'utr <i>NifZ</i> ) / <i>s1124</i> (5'utr <i>braB</i> )                             | 3028250               | untranslated region   | A    | T    | NA                               | cystein desulfurase/branched-chain aa transporter         | tRNA modification/metabolism    | information processing/metabolism  | no  |
| <i>s1145</i> (5' utr <i>ytnP</i> )                                                                | 3059481               | untranslated region   | AC   | A    | NA                               | lactonase homologue                                       | antibacterial compound          | lifestyle                          | no  |
| <i>s125</i> (5' utr <i>hxlR</i> )                                                                 | 376017                | untranslated region   | AG   | A    | NA                               | Transcriptional regulator (formaldehyde detoxification)   | stress resistance               | lifestyle                          | no  |
| <i>s486</i> (5' UTR <i>mtnE</i> )                                                                 | 1425560               | untranslated region   | C    | A    | NA                               | glutamine transaminase                                    | methionine salvage              | Metabolism                         | no  |
| <i>int</i> <i>yorN</i> / <i>yorM</i>                                                              | 2174751               | untranslated region   | ACT  | A    | NA                               | Sbeta prophage                                            | prophage                        | prophage & Mobile genetic elements | no  |
| <i>s352</i> (3' Utr <i>yhaH</i> )                                                                 | 1073872               | untranslated region   | AT   | A    | NA                               | unknown                                                   | unknown                         | unknown                            | no  |
| <i>s736</i> (dnstream <i>yocI</i> )                                                               | 2096245               | untranslated region   | TA   | T    | NA                               | unknown                                                   | unknown                         | unknown                            | no  |
| <i>s596</i> (5'utr <i>ylxY</i> )                                                                  | 1741603               | untranslated region   | AG   | A    | NA                               | unknown; similar to deacetylase                           | unknown                         | unknown                            | no  |

Variations unique to strain 3725

**INTRAGENIC**

|                                  |         |                        |       |    |                  |                                                          |                                  |                                    |     |
|----------------------------------|---------|------------------------|-------|----|------------------|----------------------------------------------------------|----------------------------------|------------------------------------|-----|
| <i>parC</i>                      | 1936310 | Non Synonymous Coding  | C     | T  | S288L            | subunit of DNA topoisomerase IV                          | DNA segregation                  | information processing             | YES |
| <i>rRNA23S</i>                   | 34740   | untranslated region    | A     | G  | NA               | ribosomal RNA 23S                                        | translation                      | information processing             | no  |
| <i>ylyB</i>                      | 1618068 | Non Synonymous Coding  | C     | T  | P287S            | unknown, similar to pseudouridylylase synthase           | translation                      | information processing             | no  |
| <i>trmD</i>                      | 1675849 | Non Synonymous Coding  | C     | T  | H227Y            | tRNA methyltransferase                                   | translation                      | information processing             | YES |
| <i>pksN</i>                      | 1841168 | indel: Frame Shift     | C     | CA | frame shift      | polyketide synthase, type I                              | antibacterial compound synthesis | Lifestyle                          | no  |
| <i>oppD</i>                      | 1224524 | Non Synonymous Coding  | T     | G  | V357G            | oligopeptide ABC transporter                             | competence and sporulation       | Lifestyle                          | no  |
| <i>gerAA</i>                     | 3391676 | Non Synonymous Coding  | A     | G  | T299A            | nutrient receptor (L-Ala) promoting spore germination    | germination                      | Lifestyle                          | no  |
| <i>s1255 /sspG</i>               | 3354116 | indel: codon deletions | G(8)* | G  | 8 codons deleted | sspG: small acidic soluble protein/S1255: unknown        | sporulation                      | Lifestyle                          | no  |
| <i>accC</i>                      | 2530964 | Non Synonymous Coding  | T     | C  | D248G            | acetyl-coA carboxylase                                   | fatty acid biosynthesis          | Metabolism                         | YES |
| <i>glcK</i>                      | 2571163 | indel: Frame Shift     | G     | GT | frame shift      | glucose kinase                                           | glucose metabolism               | Metabolism                         | no  |
| <i>gltA</i>                      | 2011091 | Non Synonymous Coding  | G     | A  | A1181V           | glutamate synthase                                       | metabolism                       | Metabolism                         | no  |
| <i>sacA</i>                      | 3902306 | Non Synonymous Coding  | C     | A  | L448F            | phosphosucrase                                           | sucrose catabolism               | Metabolism                         | no  |
| <i>ilvC &amp; s1070</i>          | 2893906 | Non Synonymous Coding  | G     | A  | A268             | ketol-ac reductoisomerase/unknown                        | aminoacids synthesis/unknown     | Metabolism/unknown                 | no  |
| <i>yaqA</i>                      | 2201408 | Non Synonymous Coding  | A     | G  | L23P             | unknown; SPβ prophage                                    | prophage                         | Prophage & Mobile genetic elements | no  |
| <i>yaqB</i>                      | 2670611 | Non Synonymous Coding  | A     | G  | Y60H             | unknown; skin element                                    | prophage                         | Prophage & Mobile genetic elements | no  |
| <i>yesY</i>                      | 774697  | indel: Frame Shift     | CA    | C  | frame shift      | unknown, similar to rhamnogalacturonan acetyltransferase | unknown                          | unknown                            | no  |
| <i>yutE</i>                      | 3319154 | Non Synonymous Coding  | C     | T  | A37T             | unknown                                                  | unknown                          | unknown                            | no  |
| <b>synonymous codon (silent)</b> |         |                        |       |    |                  |                                                          |                                  |                                    |     |
| <i>pgdS</i>                      | 3696869 | Synonymous coding      | T     | C  | L210             | gamma-DL-glutamyl hydrolase                              | capsule biosynthesis             | cellular process                   | no  |
| <i>rluB</i>                      | 2421606 | Synonymous coding      | T     | C  | Q189             | pseudouridine synthase                                   | translation                      | information processing             | no  |
| <i>yqeZ</i>                      | 2619105 | Synonymous coding      | C     | T  | A225             | Ser protease, resistance to subclancin                   | stress response                  | Lifestyle                          | no  |
| <i>ygaN</i>                      | 965353  | Synonymous coding      | A     | T  | S31              | unknown                                                  | unknown                          | unknown                            | no  |
| <i>yazT</i>                      | 2041099 | Synonymous coding      | A     | G  | D43              | unknown                                                  | unknown                          | unknown                            | no  |

**INTERGENIC**

|                            |         |                     |   |   |    |                                       |                               |                        |    |
|----------------------------|---------|---------------------|---|---|----|---------------------------------------|-------------------------------|------------------------|----|
| <i>int bsrB /yrvM</i>      | 2814468 | untranslated region | C | T | NA | bsrB: sigA antagonist / yrvM: cyclase | gene regulation/ modification | information processing | no |
| <i>s1101 (5' utr CitZ)</i> | 2982417 | untranslated region | T | A | NA | citrate synthase (TCA cycle)          | metabo                        | Metabolism             | no |
| <i>s1101 (5' utr CitZ)</i> | 2982437 | untranslated region | T | C | NA | citrate synthase (TCA cycle)          | metabo                        | Metabolism             | no |

<sup>1</sup> "int" stands for intergenic region, "utr" for untranslated region

<sup>2</sup> nucleotide position relative to the *B. subtilis* 168 sequence from GenBank (AL009126.3)

<sup>3</sup> "Ref." and "Obs." stand for nucleotide(s) present in the reference and the 3725 sequences, respectively

\*G(GCAAAAAGTCCAAAACAGCGTAAT)
