# Supplementary material for: PamR, a new MarR-like regulator affecting prophages and metabolic genes expression in Bacillus subtilis
Source: PubMed Central journal article supplement (PMC5730154; doi:10.1371/journal.pone.0189694), 2017-12-14
Supplement: pone.0189694.s007.pdf [file pone.0189694.s007.pdf]

Table S5. List of differentially expressed genes in a  $\Delta$ *pamR* strain compared to its parental wild type *B. subtilis* strain

| gene                                                                | Effect of $\Delta$ <i>pamR</i> | Exp. Diff. | Functional category                                                                  | Function                                                                                                   | Regulated by                       |
|---------------------------------------------------------------------|--------------------------------|------------|--------------------------------------------------------------------------------------|------------------------------------------------------------------------------------------------------------|------------------------------------|
| genes repressed in absence of <i>pamR</i> during exponential growth |                                |            |                                                                                      |                                                                                                            |                                    |
| <i>rasP</i>                                                         | -                              | 2,67       | Cellular processes_Cell division                                                     | intramembrane protease; control of cell division, SigV and SigW activity (via FtsL, RsiV and RsiW clivage) | U                                  |
| <i>gtcA</i>                                                         | -                              | 2,21       | Cellular processes_Cell wall synthesis and homeostasis                               | teichoic acid glycosylation protein                                                                        | CcpA (-)                           |
| <i>cpgA</i>                                                         | -                              | 2,29       | Cellular processes_Cell wall synthesis and homeostasis                               | GTPase                                                                                                     | U                                  |
| <i>prpC</i>                                                         | -                              | 2,95       | Cellular processes_Cell wall synthesis and homeostasis                               | protein phosphatases_PrkC antagonist                                                                       | U                                  |
| <i>murF</i>                                                         | -                              | 2,22       | Cellular processes_Cell wall synthesis and homeostasis_biosynthesis of peptidoglycan | peptidoglycan precursor biosynthesis                                                                       | SigM SigV                          |
| <i>mutSB</i>                                                        | -                              | 2,17       | Information processing_DNA replication, repair & recombination                       | probable DNA mismatch repair protein                                                                       | U                                  |
| <i>sbcE</i>                                                         | -                              | 2,30       | Information processing_DNA replication, repair & recombination                       | DNA double-strand break repair and competence; SMC-like protein                                            | LexA (-)                           |
| <i>dnal</i>                                                         | -                              | 2,34       | Information processing_DNA replication, repair & recombination                       | primosome component (helicase loader)                                                                      | U                                  |
| <i>parE</i>                                                         | -                              | 2,55       | Information processing_DNA replication, repair & recombination                       | chromosome segregation_subunit of DNA topoisomerase IV                                                     | LexA (-)                           |
| <i>mutM/ytaE</i>                                                    | -                              | 3,04       | Information processing_DNA replication, repair & recombination                       | formamidopyrimidine-DNA glycosidase                                                                        | SigE                               |
| <i>glxX</i>                                                         | -                              | 2,09       | Information processing_Protein synthesis                                             | translation; glutamyl-tRNA synthetase                                                                      | T-box                              |
| <i>fmt/yloL</i>                                                     | -                              | 2,34       | Information processing_Protein synthesis                                             | tRNA modification; methionyl-tRNA formyltransferase                                                        | SigA                               |
| <i>engA</i>                                                         | -                              | 2,41       | Information processing_Protein synthesis                                             | ribosome assembly ; essential GTPase for ribosome 50S assembly                                             | U                                  |
| <i>queA</i>                                                         | -                              | 2,45       | Information processing_Protein synthesis                                             | tRNA modification; S-adenosylmethionine tRNA ribosyltransferase                                            | U                                  |
| <i>valS</i>                                                         | -                              | 2,58       | Information processing_Protein synthesis                                             | translation; valyl-tRNA synthetase                                                                         | T-box                              |
| <i>cca</i>                                                          | -                              | 2,63       | Information processing_Protein synthesis                                             | tRNA modification; tRNA nucleotidyltransferase                                                             | Spx                                |
| <i>pheS</i>                                                         | -                              | 2,70       | Information processing_Protein synthesis                                             | translation; phenylalanyl-tRNA synthetase (alpha subunit)                                                  | T-box                              |
| <i>trmK</i>                                                         | -                              | 2,74       | Information processing_Protein synthesis                                             | tRNA modification; tRNA:m1A22 methyl transferase                                                           | U                                  |
| <i>truA/ybaH</i>                                                    | -                              | 2,88       | Information processing_Protein synthesis                                             | tRNA modification; pseudouridylyl synthase I                                                               | RelA (-)                           |
| <i>yukB</i>                                                         | -                              | 2,39       | Information processing_Protein synthesis_secretion                                   | part of the type VII protein secretion system; ATPase                                                      | DegU (+)                           |
| <i>deaD</i>                                                         | -                              | 2,16       | Information processing_RNA synthesis and degradation                                 | DEAD-box RNA helicases                                                                                     | U                                  |
| <i>yxaB</i>                                                         | -                              | 2,85       | Lifestyle_biofilm formation                                                          | putative exopolysaccharide synthase                                                                        | SigB AbrB (-)                      |
| <i>acpK</i>                                                         | -                              | 14,40      | Lifestyle_Biosynthesis of antibacterial compounds                                    | polyketide biosynthesis, acyl carrier protein                                                              | AbrB (-) CodY (+)                  |
| <i>cheR</i>                                                         | -                              | 2,30       | Lifestyle_Motility & chemotaxis                                                      | MCPs methyltransferase                                                                                     | U                                  |
| <i>motA</i>                                                         | -                              | 2,36       | Lifestyle_Motility & chemotaxis                                                      | H+-coupled flagellar stator                                                                                | SigD                               |
| <i>flhG</i>                                                         | -                              | 2,59       | Lifestyle_Motility & chemotaxis                                                      | GTPase activating protein, activates FlhF                                                                  | SigD CodY DegU Spo0A, SwrAA/1      |
| <i>spoVT</i>                                                        | -                              | 2,37       | Lifestyle_Sporulation                                                                | regulation of forespore gene expression; transcription regulator                                           | SigF/G                             |
| <i>sigF</i>                                                         | -                              | 2,56       | Lifestyle_Sporulation                                                                | RNA polymerase forespore-specific (early) sigma factor SigF                                                | AbrB (-) Spo0A (+) SinR (-) SigF/G |
| <i>yhbB/ygaQ</i>                                                    | -                              | 2,67       | Lifestyle_Sporulation                                                                | spore coat protein, amidase                                                                                | SigE                               |
| <i>ytaF</i>                                                         | -                              | 2,72       | Lifestyle_Sporulation                                                                | U                                                                                                          | SigE                               |
| <i>thiQ</i>                                                         | -                              | 3,14       | Lifestyle_Sporulation                                                                | U                                                                                                          | SigE SpoIIID (-)                   |
| <i>tepA</i>                                                         | -                              | 2,49       | Lifestyle_Sporulation_germination                                                    | degradation of SASPs; orphan ClpP-like germination protease                                                | SigG SpoVT (-)                     |
| <i>araF</i>                                                         | -                              | 2,34       | Metabolism_Biosynthesis & acquisition of Aminoacids                                  | chorismate synthase                                                                                        | SigA                               |
| <i>tyrA</i>                                                         | -                              | 2,50       | Metabolism_Biosynthesis & acquisition of Aminoacids                                  | biosynthesis of tyrosine; prephenate dehydrogenase                                                         | MtrB TRAP (-)                      |
| <i>proB</i>                                                         | -                              | 2,53       | Metabolism_Biosynthesis & acquisition of Aminoacids                                  | biosynthesis of proline; glutamate 5-kinase                                                                | T-box                              |
| <i>trpD</i>                                                         | -                              | 2,66       | Metabolism_Biosynthesis & acquisition of Aminoacids                                  | biosynthesis of tryptophan, anthranilate phosphoribosyltransferase                                         | MtrB TRAP (-)                      |
| <i>artQ</i>                                                         | -                              | 2,72       | Metabolism_Biosynthesis & acquisition of Aminoacids                                  | Arginine uptake; arginine ABC transporter (permease)                                                       | casa ac (-)                        |
| <i>araB</i>                                                         | -                              | 2,74       | Metabolism_Biosynthesis & acquisition of Aminoacids                                  | 3-dehydroquinate synthase                                                                                  | SigA                               |
| <i>thrR</i>                                                         | -                              | 2,75       | Metabolism_Biosynthesis & acquisition of Aminoacids                                  | TR, control of threonine biosynthesis                                                                      | U                                  |
| <i>hisH</i>                                                         | -                              | 2,93       | Metabolism_Biosynthesis & acquisition of Aminoacids                                  | histidine biosynthesis; imidazole glycerol phosphate synthase (glutaminase subunit)                        | U                                  |
| <i>hisA</i>                                                         | -                              | 3,07       | Metabolism_Biosynthesis & acquisition of Aminoacids                                  | biosynthesis of histidine; phosphoribosylformimino-5-aminoimidazole carboxamide ribotide isomerase         | U                                  |
| <i>trpF</i>                                                         | -                              | 3,26       | Metabolism_Biosynthesis & acquisition of Aminoacids                                  | synthesis of tryptophan, phosphoribosylanthranilate isomerase                                              | MtrB TRAP (-)                      |
| <i>hisB</i>                                                         | -                              | 3,70       | Metabolism_Biosynthesis & acquisition of Aminoacids                                  | biosynthesis of histidine; imidazoleglycerol-phosphate dehydratase                                         | U                                  |
| <i>mccB</i>                                                         | -                              | 4,43       | Metabolism_Biosynthesis & acquisition of Aminoacids                                  | biosynthesis of cysteine; methionine-to-cysteine conversion; cystathionine lyase/ homocysteine lyase       | CymR (-) Spx (+)                   |
| <i>mccA</i>                                                         | -                              | 4,51       | Metabolism_Biosynthesis & acquisition of Aminoacids                                  | biosynthesis of cysteine; methionine-to-cysteine conversion; O-acetylserine-thiol-lyase                    | CymR (-) Spx (+)                   |
| <i>lplJ</i>                                                         | -                              | 2,14       | Metabolism_Biosynthesis of cofactors                                                 | Lipoate:protein ligase                                                                                     | U                                  |
| <i>moaE</i>                                                         | -                              | 2,29       | Metabolism_Biosynthesis of cofactors                                                 | nitrate respiration; molybdopterin synthase (large subunit)                                                | U                                  |
| <i>panB</i>                                                         | -                              | 2,40       | Metabolism_Biosynthesis of cofactors                                                 | biosynthesis of coenzyme A; 3-methyl-2-oxobutanoate hydroxymethyltransferase                               | U                                  |
| <i>pdxK</i>                                                         | -                              | 2,49       | Metabolism_Biosynthesis of cofactors                                                 | pyridoxal biosynthesis; kinase                                                                             | U                                  |
| <i>birA</i>                                                         | -                              | 2,50       | Metabolism_Biosynthesis of cofactors                                                 | Transcriptional regulator; Biotin-protein ligase                                                           | BirA (-) Spx (+)                   |
| <i>bioW</i>                                                         | -                              | 2,86       | Metabolism_Biosynthesis of cofactors                                                 | Biotin synthesis; pimeloyl-CoA synthase                                                                    | BirA (-)                           |
| <i>thiU</i>                                                         | -                              | 2,88       | Metabolism_Biosynthesis of cofactors                                                 | thiamine transporter (binding protein)                                                                     | Thi-box                            |
| <i>folC</i>                                                         | -                              | 2,91       | Metabolism_Biosynthesis of cofactors                                                 | biosynthesis of folate ; folyl-polyglutamate synthetase                                                    | Thi-box                            |
| <i>thiS</i>                                                         | -                              | 3,43       | Metabolism_Biosynthesis of cofactors                                                 | biosynthesis of thiamine; sulfur carrier protein                                                           | Thi-box                            |
| <i>bioF</i>                                                         | -                              | 3,70       | Metabolism_Biosynthesis of cofactors                                                 | Biotin synthesis; 8-amino-7-oxononanoate synthase                                                          | BirA (-)                           |
| <i>tenI</i>                                                         | -                              | 3,97       | Metabolism_Biosynthesis of cofactors                                                 | biosynthesis of thiamine; thiazole tautomerase                                                             | Thi-box                            |
| <i>sumT</i>                                                         | -                              | 9,87       | Metabolism_Biosynthesis of cofactors                                                 | siroheme biosynthesis , sulfite reduction;probable uroporphyrin-III C-methyltransferase                    | CymR (-) S-box                     |
| <i>ykuN</i>                                                         | -                              | 2,54       | Metabolism_Electron transport & ATP synthesis                                        | electron transfer; flavodoxin                                                                              | Fur (-) NsrR (-) Kre (-) ResD (+)  |
| <i>atpF</i>                                                         | -                              | 2,56       | Metabolism_Electron transport & ATP synthesis                                        | ATP synthase( Fo complex subunit b)                                                                        | RelA (-)                           |
| <i>atpH</i>                                                         | -                              | 2,96       | Metabolism_Electron transport & ATP synthesis                                        | ATP synthase( Fo complex subunit d)                                                                        | RelA (-)                           |
| <i>etfB</i>                                                         | -                              | 3,22       | Metabolism_Electron transport & ATP synthesis                                        | fatty acid degradation, electron transfer flavoprotein (beta subunit)                                      | CcpA (-) FadR (-)                  |

|                  |   |      |                                                           |                                                                                                |             |          |                        |
|------------------|---|------|-----------------------------------------------------------|------------------------------------------------------------------------------------------------|-------------|----------|------------------------|
| <i>resB/ypxB</i> | - | 2,36 | Metabolism_Electron transport & ATP synthesis_Respiration | cytochrome c biogenesis; part of the ResB-ResC haem translocase                                | CcpA (-)    | PhoP (+) | ResD (+)               |
| <i>pfkA</i>      | - | 2,69 | Metabolism_Glycolysis                                     | 6-phosphofructokinase                                                                          | Glucose (+) |          |                        |
| <i>dhbB</i>      | - | 2,24 | Metabolism_iron metabolism                                | isochorismatase; biosynthesis of the siderophore bacillibactin                                 | Fur (-)     | AbrB (-) | Kre (-)                |
| <i>sufU</i>      | - | 2,58 | Metabolism_iron metabolism                                | biosynthesis of iron-sulfur clusters; Fe-S cluster scaffold protein                            | U           |          |                        |
| <i>mobB</i>      | - | 2,66 | Metabolism_Nitrate respiration                            | molybdopterin-guanine dinucleotide cofactor synthesis protein                                  | U           |          |                        |
| <i>dra</i>       | - | 2,24 | Metabolism_nucleotide metabolism                          | nucleotide catabolism_deoxyribose-phosphate aldolase                                           | CcpA (-)    | DeoR (-) |                        |
| <i>nupC</i>      | - | 3,02 | Metabolism_nucleotide metabolism                          | pyrimidine nucleoside transport protein                                                        | CcpA (-)    | DeoR (-) |                        |
| <i>purH</i>      | - | 2,90 | Metabolism_nucleotide metabolism                          | purine biosynthesis; phosphoribosylaminoimidazole carboxamide formyltransferase                | PurR (-)    |          |                        |
| <i>pyrF</i>      | - | 3,63 | Metabolism_nucleotide metabolism                          | pyrimidine biosynthesis, orotidine-5-phosphate decarboxylase                                   | PyrR        |          |                        |
| <i>araL</i>      | - | 4,58 | Metabolism_poorly characterized                           | sugar-P phosphatase                                                                            | CcpA (-)    | AraR (-) |                        |
| <i>crh</i>       | - | 2,43 | Metabolism_regulation of carbon flux                      | CcpA cofactor                                                                                  | CcpA (-)    |          |                        |
| <i>rhsA</i>      | - | 3,09 | Metabolism_Sugar uptake                                   | Ribose uptake; ABC transporter (ATP-binding protein)                                           | CcpA (-)    | AbrB (+) |                        |
| <i>glcK</i>      | - | 3,14 | Metabolism_Sugar uptake                                   | glucose kinase                                                                                 | U           |          |                        |
| <i>levG</i>      | - | 4,59 | Metabolism_Sugar uptake                                   | fructose uptake; fructose-specific PTS, EIID component                                         | CcpA (-)    | LevR (+) | SigL                   |
| <i>rhsD</i>      | - | 5,13 | Metabolism_Sugar uptake                                   | Ribose uptake; ABC transporter                                                                 | CcpA (-)    | AbrB (+) |                        |
| <i>levD</i>      | - | 6,11 | Metabolism_Sugar uptake                                   | fructose uptake; fructose-specific PTS, EIIA component                                         | CcpA (-)    | LevR (+) | SigL                   |
| <i>levF</i>      | - | 7,25 | Metabolism_Sugar uptake                                   | fructose uptake; fructose-specific PTS, EIIC component                                         | CcpA (-)    | LevR (+) | SigL                   |
| <i>levE</i>      | - | 7,43 | Metabolism_Sugar uptake                                   | fructose uptake; trigger enzyme:fructose PTS EIIB                                              | CcpA (-)    | LevR (+) | SigL                   |
| <i>cysH</i>      | - | 2,67 | Metabolism_sulfur metabolism                              | sulfate reduction, phosphoadenosine phosphosulfate sulfotransferase                            | CymR (-)    | S-box    |                        |
| <i>sat</i>       | - | 6,52 | Metabolism_sulfur metabolism                              | sulfate activation, sulfate adenyltransferase                                                  | CymR (-)    | S-box    |                        |
| <i>cysC</i>      | - | 7,16 | Metabolism_sulfur metabolism                              | sulfate reduction and activation, adenyllyl-sulfate kinase                                     | CymR (-)    |          |                        |
| <i>citZ</i>      | - | 2,38 | Metabolism_TCA cycle                                      | citrate synthase II                                                                            | CcpA (-)    | CcpC (-) |                        |
| <i>mdh</i>       | - | 2,47 | Metabolism_TCA cycle                                      | malate dehydrogenase                                                                           | CcpA (-)    | CcpC (-) |                        |
| <i>sucC</i>      | - | 2,58 | Metabolism_TCA cycle                                      | TCA cycle,succinyl-CoA synthetase (beta subunit)                                               | CcpA (-)    |          |                        |
| <i>icd</i>       | - | 2,64 | Metabolism_TCA cycle                                      | isocitrate dehydrogenase                                                                       | CcpA (-)    | CcpC (-) |                        |
| <i>sdhA</i>      | - | 2,78 | Metabolism_TCA cycle                                      | succinate dehydrogenase (flavoprotein subunit)                                                 | FsrA (-)    |          |                        |
| <i>sucD</i>      | - | 2,91 | Metabolism_TCA cycle                                      | TCA cycle,succinyl-CoA synthetase (beta subunit)                                               | CcpA (-)    |          |                        |
| <i>gcvT</i>      | - | 2,41 | Metabolism_utilization of amino acids                     | glycine utilization; aminomethyltransferase                                                    | Gly-box     |          |                        |
| <i>gcvPA</i>     | - | 2,68 | Metabolism_utilization of amino acids                     | glycine utilization; glycine decarboxylase (subunit 1)                                         | Gly-box     |          |                        |
| <i>rocG</i>      | - | 3,43 | Metabolism_utilization of amino acids                     | arginine utilization; controls the activity of GlcT; glutamate deshydrogenase                  | CcpA (-)    | AbrB (-) | RocR (+) AhrC (+) SigL |
| <i>bgIA</i>      | - | 2,35 | Metabolism_utilization of beta-glucosides                 | utilization of beta-glucosides; 6-phospho-beta-glucosidase                                     | U           |          |                        |
| <i>bgIH</i>      | - | 3,98 | Metabolism_utilization of beta-glucosides                 | salicin utilization, phospho-beta-glucosidase                                                  | CcpA (-)    | LicT     |                        |
| <i>fadF/ywjF</i> | - | 3,10 | Metabolism_utilization of fatty acids                     | Fatty acid degradation; function unknown                                                       | FadR (-)    |          |                        |
| <i>galK</i>      | - | 2,38 | Metabolism_utilization of galactose                       | galactokinase                                                                                  | CcpA (-)    |          |                        |
| <i>iolE</i>      | - | 3,11 | Metabolism_utilization of inositol                        | myo-inositol catabolism, 2-keto-myo-inositol dehydratase, dehydration of 2-keto-myo-inositol   | CcpA (-)    | IolR (+) |                        |
| <i>iolD</i>      | - | 3,42 | Metabolism_utilization of inositol                        | myo-inositol catabolism, formation of 5-deoxy-D-glucuronic acid (3rd reaction)                 | CcpA (-)    | IolR (+) |                        |
| <i>iolC</i>      | - | 3,74 | Metabolism_utilization of inositol                        | myo-inositol catabolism, formation of 2-deoxy-5-keto-gluconic acid-6-phosphate (5th reaction)  | CcpA (-)    | IolR (+) |                        |
| <i>iolG</i>      | - | 3,79 | Metabolism_utilization of inositol                        | myo-inositol catabolism, inositol 2-dehydrogenase                                              | CcpA (-)    | IolR (+) |                        |
| <i>iolB</i>      | - | 4,64 | Metabolism_utilization of inositol                        | myo-inositol catabolism; formation of 2-deoxy-5-keto-gluconic acid (4th reaction)              | CcpA (-)    | IolR (+) |                        |
| <i>mtID</i>      | - | 3,49 | Metabolism_utilization of mannitol                        | mannitol-1-phosphate 5-dehydrogenase                                                           | MiTR        |          |                        |
| <i>mtIA</i>      | - | 4,18 | Metabolism_utilization of mannitol                        | mannitol uptake; trigger enzyme: mannitol-specific phosphotransferase system, EIICB of the PTS | MiTR        |          |                        |
| <i>mtIF</i>      | - | 6,38 | Metabolism_utilization of mannitol                        | PTS mannitol-specific enzyme IIA component                                                     | MiTR        |          |                        |
| <i>acuA</i>      | - | 3,19 | Metabolism_utilization of organic acids                   | control of AcsA activity; N-acetyltransferase                                                  | CcpA (-)    |          |                        |
| <i>citT</i>      | - | 3,99 | Metabolism_utilization of organic acids                   | two-component response regulator, regulation of citrate uptake                                 | CitT        |          |                        |
| <i>mall</i>      | - | 2,80 | Metabolism_utilization of other Carbon sources            | starch & maltodextrine utilization; alpha-glucosidase                                          | U           |          |                        |
| <i>licB</i>      | - | 4,30 | Metabolism_utilization of other Carbon sources            | lichenan uptake; trigger enzyme:lichenan PTS EIIB                                              | CcpA (-)    | LicR (+) |                        |
| <i>mdxE</i>      | - | 4,71 | Metabolism_utilization of other Carbon sources            | maltodextrin ABC transporter                                                                   | U           |          |                        |
| <i>xynD</i>      | - | 2,54 | Metabolism_utilization of other polymeric carbohydrates   | arabinoxylan degradation; arabinoxylan arabinofuranohydrolase                                  | AbrB (-)    |          |                        |
| <i>gmuE/ydhR</i> | - | 2,52 | Metabolism_utilization of specific C source               | glucomannan utilization; mannose kinase                                                        | AbrB (+)    | CcpA (-) | GmuR (-)               |
| <i>gmuD/ydhP</i> | - | 2,53 | Metabolism_utilization of specific C source               | glucomannan utilization; phospho-beta-mannosidase                                              | AbrB (+)    | CcpA (-) | GmuR (-)               |
| <i>gmuF/ydhs</i> | - | 2,86 | Metabolism_utilization of specific C source               | glucomannan utilization; mannose-6-P-isomerase                                                 | AbrB (+)    | CcpA (-) | GmuR (-)               |
| <i>gmuA/ydhN</i> | - | 2,91 | Metabolism_utilization of specific C source               | glucomannan-specific phosphotransferase system, EIIA component                                 | AbrB (+)    | CcpA (-) | GmuR (-)               |
| <i>gmuC/ydhO</i> | - | 3,08 | Metabolism_utilization of specific C source               | glucomannan-specific phosphotransferase system, EIIC component                                 | AbrB (+)    | CcpA (-) | GmuR (-)               |
| <i>kdgK</i>      | - | 3,84 | Metabolism_utilization of specific C source               | utilization of galacturonic acid, 2-dehydro-3-deoxygluconokinase                               | CcpA (-)    | KgdR (-) |                        |
| <i>treA</i>      | - | 2,98 | Metabolism_utilization of trehalose                       | trehalose utilization_phospho-alpha-glucosidase                                                | CcpA (-)    | TreR (-) | PhoP (+)               |
| <i>rhaM</i>      | - | 3,68 | Metabolism_utilization of rhamnose                        | utilization of rhamnose, mutarotase                                                            | CcpA (-)    | RhaR (-) |                        |
| <i>xtmB</i>      | - | 2,35 | Prophages & mobile genetic elements_PBSX prophage         | phage DNA replication; PBSX terminase                                                          | Xpf (+)     |          |                        |
| <i>xkdE</i>      | - | 2,69 | Prophages & mobile genetic elements_PBSX prophage         | U                                                                                              | Xpf (+)     |          |                        |
| <i>xtmA</i>      | - | 2,77 | Prophages & mobile genetic elements_PBSX prophage         | phage DNA replication; PBSX terminase                                                          | Xpf (+)     |          |                        |
| <i>xkdQ</i>      | - | 2,78 | Prophages & mobile genetic elements_PBSX prophage         | U                                                                                              | U           |          |                        |
| <i>xtrA</i>      | - | 2,83 | Prophages & mobile genetic elements_PBSX prophage         | U                                                                                              | Xre (-)     |          |                        |
| <i>xepA</i>      | - | 2,86 | Prophages & mobile genetic elements_PBSX prophage         | phage release, PBSX prophage lytic exoenzyme                                                   | U           |          |                        |
| <i>xkdG</i>      | - | 2,98 | Prophages & mobile genetic elements_PBSX prophage         | U                                                                                              | Xpf (+)     |          |                        |
| <i>xkdF</i>      | - | 3,07 | Prophages & mobile genetic elements_PBSX prophage         | U                                                                                              | Xpf (+)     |          |                        |
| <i>xkdJ</i>      | - | 3,08 | Prophages & mobile genetic elements_PBSX prophage         | U                                                                                              | Xpf (+)     |          |                        |
| <i>xkdH</i>      | - | 3,12 | Prophages & mobile genetic elements_PBSX prophage         | U                                                                                              | Xpf (+)     |          |                        |
| <i>xhIA</i>      | - | 3,13 | Prophages & mobile genetic elements_PBSX prophage         | host cell lysis upon induction of PBSX                                                         | U           |          |                        |
| <i>xkdS</i>      | - | 3,13 | Prophages & mobile genetic elements_PBSX prophage         | U                                                                                              | U           |          |                        |
| <i>xkdI</i>      | - | 3,14 | Prophages & mobile genetic elements_PBSX prophage         | U                                                                                              | Xpf (+)     |          |                        |

|              |   |      |                                                                     |                                                                                                       |                                   |
|--------------|---|------|---------------------------------------------------------------------|-------------------------------------------------------------------------------------------------------|-----------------------------------|
| <i>xkdX</i>  | - | 3,21 | Prophages & mobile genetic elements_PBSX prophage                   | U                                                                                                     | U                                 |
| <i>xkdR</i>  | - | 3,30 | Prophages & mobile genetic elements_PBSX prophage                   | U                                                                                                     | U                                 |
| <i>xkdC</i>  | - | 3,43 | Prophages & mobile genetic elements_PBSX prophage                   | U                                                                                                     | Xre (-)                           |
| <i>xhlB</i>  | - | 3,45 | Prophages & mobile genetic elements_PBSX prophage                   | host cell lysis                                                                                       | U                                 |
| <i>xkdW</i>  | - | 3,64 | Prophages & mobile genetic elements_PBSX prophage                   | U                                                                                                     | U                                 |
| <i>xkdK</i>  | - | 3,65 | Prophages & mobile genetic elements_PBSX prophage                   | U                                                                                                     | Xpf (+)                           |
| <i>xkdB</i>  | - | 3,77 | Prophages & mobile genetic elements_PBSX prophage                   | U                                                                                                     | Xre (-)                           |
| <i>xkdD</i>  | - | 4,07 | Prophages & mobile genetic elements_PBSX prophage                   | U                                                                                                     | Xre (-)                           |
| <i>ykzM</i>  | - | 4,73 | Prophages & mobile genetic elements_PBSX prophage                   | U                                                                                                     | U                                 |
| <i>yzkK</i>  | - | 5,55 | Prophages & mobile genetic elements_PBSX prophage                   | U                                                                                                     | U                                 |
| <i>psdS</i>  | - | 2,41 | Stress response_Antibiotic resistance                               | two-component sensor kinase, response to lipid II-binding lantibiotics, such as nisin and gallidermin | PsdR                              |
| <i>ylvIA</i> | - | 2,14 | stress response_cell envelope stress resistance                     | U                                                                                                     | SigW AbrB (-)                     |
| <i>yknW</i>  | - | 2,60 | stress response_cell envelope stress resistance                     | modulates assembly of the YknX-YknY-YknZ ABC transporter for the export of the SdpC toxin             | AbrB (-) SigW                     |
| <i>yqfA</i>  | - | 2,76 | stress response_cell envelope stress resistance                     | flotillin-like protein, resistance against sublancin                                                  | SigW                              |
| <i>floT</i>  | - | 2,44 | Stress response_membrane dynamics                                   | lipid microdomains organization; resistance to cefuroxime                                             | SigW                              |
| <i>yuaF</i>  | - | 2,59 | Stress response_membrane dynamics                                   | NfeD2, role in maintaining membrane integrity during conditions of cellular stress                    | SigW                              |
| <i>psdA</i>  | - | 2,69 | Stress response_resistance to antimicrobials                        | export of lantibiotics, such as nisin and gallidermin                                                 | PsdR (+)                          |
| <i>yhcY</i>  | - | 2,13 | U                                                                   | two component sensor kinase                                                                           | LiaR (+)                          |
| <i>ytIR</i>  | - | 2,25 | U                                                                   | U                                                                                                     | SigD                              |
| <i>yqeK</i>  | - | 2,31 | U                                                                   | U                                                                                                     | U                                 |
| <i>yprA</i>  | - | 2,33 | U                                                                   | putative helicase                                                                                     | U                                 |
| <i>yloV</i>  | - | 2,34 | U                                                                   | U                                                                                                     | U                                 |
| <i>ykuO</i>  | - | 2,34 | U                                                                   | U                                                                                                     | Fur (-) NsrR (-) Kre (-) ResD (+) |
| <i>yloM</i>  | - | 2,36 | U                                                                   | similar to 5-adenosyl-L-methionine-dependent 16S rRNA m5C967 methyltransferase                        | SigA                              |
| <i>yusY</i>  | - | 2,37 | U                                                                   | similar to endopeptidase                                                                              | U                                 |
| <i>ypgQ</i>  | - | 2,38 | U                                                                   | Mn2-dependent pyrophosphohydrolase                                                                    | U                                 |
| <i>yqjZ</i>  | - | 2,42 | U                                                                   | U                                                                                                     | U                                 |
| <i>ycnE</i>  | - | 2,42 | U                                                                   | U                                                                                                     | U                                 |
| <i>yyaE</i>  | - | 2,43 | U                                                                   | similar to formate deshydrogenase, put electron transport                                             | U                                 |
| <i>yyzE</i>  | - | 2,49 | U                                                                   | similar to PTS IIE                                                                                    | U                                 |
| <i>ylmE</i>  | - | 2,54 | U                                                                   | poorly charcterized; involved in control of the CoA pool                                              | Spo0A (-)                         |
| <i>yloN</i>  | - | 2,57 | U                                                                   | similar to rRNA methyltransferase                                                                     | U                                 |
| <i>ytpQ</i>  | - | 2,59 | U                                                                   | maybe involved in Fe homeostasis                                                                      | Spx (+)                           |
| <i>ycbM</i>  | - | 2,71 | U                                                                   | predicted two-component sensor kinase                                                                 | U                                 |
| <i>ynbB</i>  | - | 2,79 | U                                                                   | U                                                                                                     | U                                 |
| <i>ysmA</i>  | - | 2,82 | U                                                                   | U                                                                                                     | U                                 |
| <i>yrhE</i>  | - | 2,84 | U                                                                   | U                                                                                                     | U                                 |
| <i>yxil</i>  | - | 3,20 | U                                                                   | U                                                                                                     | U                                 |
| <i>yhcF</i>  | - | 3,26 | U                                                                   | putative transcription factor (GntR family)                                                           | U                                 |
| <i>lplA</i>  | - | 3,44 | U                                                                   | putative ABC transporters                                                                             | U                                 |
| <i>yxIM</i>  | - | 3,80 | U                                                                   | U                                                                                                     | U                                 |
| <i>yvrO</i>  | - | 2,98 | U (put based on regulation: Lifestyle_stationnary phase adaptation) | putative ABC transporters                                                                             | AbrB (-) ComK (+)                 |
| <i>acuB</i>  | - | 2,71 | U (put based on regulation: metabolism)                             | U                                                                                                     | CcpA (-)                          |
| <i>yjmB</i>  | - | 2,86 | U (put based on regulation: metabolism)                             | similar to symporter                                                                                  | CcpA (-) ExuR (-)                 |
| <i>msmE</i>  | - | 3,05 | U (put based on regulation: metabolism)                             | putative melibiose uptake; ABC transporter                                                            | CcpA (-)                          |
| <i>lrgA</i>  | - | 3,79 | U (put based on regulation: metabolism)                             | putative pyruvate transporter                                                                         | CcpA (-) Kre (-) LytT (+)         |
| <i>yjmC</i>  | - | 4,10 | U (put based on regulation: metabolism)                             | may be involved in galacturonate utilization                                                          | CcpA (-) ExuR (-)                 |
| <i>yesM</i>  | - | 4,38 | U (put based on regulation: metabolism)                             | two-component sensor kinase                                                                           | CcpA (-)                          |
| <i>yxkK</i>  | - | 7,19 | U (put based on regulation: metabolism_sulfur metabo)               | putative utilization of a modified cystein variant; similar to monooxygenase                          | CymR (-)                          |
| <i>yxkN</i>  | - | 8,86 | U (put based on regulation: metabolism_sulfur metabo)               | putative cystein ABC transporter                                                                      | CymR (-)                          |
| <i>yxkL</i>  | - | 9,47 | U (put based on regulation: metabolism_sulfur metabo)               | putative sulfur N-acetylase                                                                           | CymR (-)                          |

genes induced in absence of *pamR* during exponential growth

|              |   |      |                                                                                      |                                                                                |                   |
|--------------|---|------|--------------------------------------------------------------------------------------|--------------------------------------------------------------------------------|-------------------|
| <i>ydjM</i>  | + | 5,39 | Cellular processes_Cell wall synthesis and homeostasis                               | May be involved in cell wall metabolism (WalR regulon)                         | WalR (+) PhoP (+) |
| <i>tagC</i>  | + | 3,17 | Cellular processes_Cell wall synthesis and homeostasis_Biosynthesis of teichoic acid | unknown function                                                               | LexA (-)          |
| <i>tagD</i>  | + | 3,17 | Cellular processes_Cell wall synthesis and homeostasis_Biosynthesis of teichoic acid | Glycerol-3-phosphate cytidylyltransferase                                      | WalR (+) PhoP (-) |
| <i>ggaB</i>  | + | 3,31 | Cellular processes_Cell wall synthesis and homeostasis_Biosynthesis of teichoic acid | Galactosamine-containing minor teichoic acid biosynthesis                      | SigA              |
| <i>tagB</i>  | + | 3,84 | Cellular processes_Cell wall synthesis and homeostasis_Biosynthesis of teichoic acid | putative CDP-glycerol:glycerol phosphate glycerophosphotransferase             | WalR (+) PhoP (-) |
| <i>tagA</i>  | + | 4,24 | Cellular processes_Cell wall synthesis and homeostasis_Biosynthesis of teichoic acid | UDP-N-acetyl-D-mannosamine transferase                                         | WalR (+) PhoP (-) |
| <i>ggaA</i>  | + | 4,64 | Cellular processes_Cell wall synthesis and homeostasis_Biosynthesis of teichoic acid | Galactosamine-containing minor teichoic acid biosynthesis; activity unknown    | SigA              |
| <i>mntR</i>  | + | 2,77 | Cellular processes_Trace metal homeostasis (Cu, Zn, Ni, Mn, Mo)                      | Regulation of manganese transport; transcriptional regulator (DtxR family)     | MntR              |
| <i>hbs</i>   | + | 2,92 | Information processing_DNA condensation/segregation                                  | DNA packaging; Non-specific DNA-binding protein                                | LexA (-) SigH     |
| <i>secE</i>  | + | 3,16 | Information processing_Protein synthesis_secretion                                   | Protein secretion; preprotein translocase                                      | U                 |
| <i>rpmGC</i> | + | 2,83 | Information processing_Protein synthesis_translation                                 | Replaces L33 under conditions of zinc depletion; alternative ribosomal protein | Zur (-)           |
| <i>rpsO</i>  | + | 2,95 | Information processing_Protein synthesis_translation                                 | Ribosomal protein S15                                                          | U                 |
| <i>rpmB</i>  | + | 3,45 | Information processing_Protein synthesis_translation                                 | Ribosomal protein L28                                                          | U                 |
| <i>rpmGB</i> | + | 3,49 | Information processing_Protein synthesis_translation                                 | Ribosomal protein L33b                                                         | U                 |
| <i>rpsT</i>  | + | 3,81 | Information processing_Protein synthesis_translation                                 | Ribosomal protein S20                                                          | U                 |

|                      |   |      |                                                        |                                                                                                   |                                                         |
|----------------------|---|------|--------------------------------------------------------|---------------------------------------------------------------------------------------------------|---------------------------------------------------------|
| <i>trnD-Cys/trnR</i> | + | 2,97 | Information processing_Protein synthesis_tRNA          | tRNA-Cys                                                                                          | SigA                                                    |
| <i>trnD-Trp/trnR</i> | + | 3,16 | Information processing_Protein synthesis_tRNA          | tRNA-Trp                                                                                          | SigA                                                    |
| <i>trnD-Ser/trnR</i> | + | 3,44 | Information processing_Protein synthesis_tRNA          | tRNA-Ser                                                                                          | SigA                                                    |
| <i>trnB-Met3</i>     | + | 3,62 | Information processing_Protein synthesis_tRNA          | tRNA-Met                                                                                          | SigA                                                    |
| <i>albG</i>          | + | 3,64 | Lifestyle_Biosynthesis of antibacterial compounds      | Production of subtilisin; activity unknown                                                        | AbrB (-) Rok (-) ResD (+)                               |
| <i>ntdR</i>          | + | 3,73 | Lifestyle_Biosynthesis of antibacterial compounds      | Activator of ntdABC-glcP operon; transcriptional regulator (LacI family)                          | AbrB (-) NtdR (+)                                       |
| <i>comK</i>          | + | 2,74 | Lifestyle_Genetic competence                           | Competence transcription factor                                                                   | AbrB (-) Spo0A (+) CodY (-) Rok (-), ComK (+), DegU (+) |
| <i>comC</i>          | + | 2,74 | Lifestyle_Genetic competence                           | required for processing and translocation of ComGC, ComGD, ComGE and ComGG; protease              | ComK (+)                                                |
| <i>kre</i>           | + | 3,31 | Lifestyle_Genetic competence                           | inhibitor of competence; ComK repressor                                                           | ComK (-)                                                |
| <i>sda</i>           | + | 2,68 | Lifestyle_Sporulation                                  | checkpoint coupling replication and sporulation; inhibitor of Spo0A phosphorelay                  | LexA (-) DnaA (+)                                       |
| <i>yhfM</i>          | + | 2,70 | Lifestyle_Sporulation                                  | U                                                                                                 | SigF                                                    |
| <i>phrE</i>          | + | 3,48 | Lifestyle_Sporulation                                  | Regulator of RapE phosphatase                                                                     | CcpA (-) AbrB (-) SigH CodY (-), ComA (+)               |
| <i>yozQ</i>          | + | 3,61 | Lifestyle_Sporulation                                  | U                                                                                                 | SigG                                                    |
| <i>catM</i>          | + | 3,87 | Lifestyle_Sporulation                                  | spore resistance; spore coat protein                                                              | SigE GerE (+) SpoIIID (-)                               |
| <i>yknT</i>          | + | 3,88 | Lifestyle_Sporulation                                  | spore protection; spore coat protein                                                              | SigE SpoIIID (+)                                        |
| <i>ypzA</i>          | + | 4,13 | Lifestyle_Sporulation                                  | U                                                                                                 | SigG                                                    |
| <i>yisi</i>          | + | 4,16 | Lifestyle_Sporulation                                  | inhibition of phosphorelay; Spo0A-P phosphatase                                                   | PchR (+)                                                |
| <i>cotX</i>          | + | 5,96 | Lifestyle_Sporulation                                  | spore resistance; spore crust assembly                                                            | SigE GerE (+) SpoIIID (-)                               |
| <i>catC</i>          | + | 6,28 | Lifestyle_Sporulation                                  | spore resistance; spore coat protein                                                              | SigK GerE (+) SpoIIID (-)                               |
| <i>yckD</i>          | + | 6,38 | Lifestyle_Sporulation                                  | U                                                                                                 | SigF/G                                                  |
| <i>yhcN</i>          | + | 3,05 | Lifestyle_Sporulation_germination                      | efficient spore germination; activity unknown                                                     | SigF/G                                                  |
| <i>gerD</i>          | + | 3,37 | Lifestyle_Sporulation_germination                      | Scaffold of the germinosome                                                                       | SigF/G                                                  |
| <i>sinR</i>          | + | 2,76 | Lifestyle_stationary phase adaptation                  | Transcriptional regulator of post-exponential-phase responses genes, control of biofilm formation | AbrB (-) SinR (-) Spo0A (+) ScoC (-)                    |
| <i>abrB</i>          | + | 4,34 | Lifestyle_stationary phase adaptation                  | Transition state regulator_trnscritonal regulator                                                 | AbrB (-) Spo0A (-)                                      |
| <i>lrpB</i>          | + | 3,51 | Metabolism_Biosynthesis & acquisition of Aminoacids    | metabolism of glycine; Repression of glyA transcription and KinB-dependent sporulation            | U                                                       |
| <i>lrpA</i>          | + | 5,26 | Metabolism_Biosynthesis & acquisition of Aminoacids    | metabolism of glycine; Repression of glyA transcription and KinB-dependent sporulation            | U                                                       |
| <i>pyrR</i>          | + | 3,56 | Metabolism_Biosynthesis & acquisition of nucleotides   | Transcriptional antiterminator of the pyr operon                                                  | PyrR                                                    |
| <i>pyrP</i>          | + | 4,13 | Metabolism_Biosynthesis & acquisition of nucleotides   | uracil permease                                                                                   | PyrR                                                    |
| <i>tnrA</i>          | + | 2,45 | Metabolism_nitrogen metabolism                         | control of nitrogen assimilation; transcriptional regulator (MerR family)                         | GlnR (-) TnrA (+)                                       |
| <i>nupG</i>          | + | 2,78 | metabolism_nucleotide metabolism                       | Purine nucleosides transporter                                                                    | G-box                                                   |
| <i>degR</i>          | + | 3,58 | Metabolism_Regulation of degradative enzyme production | control of DegU; Positive effector of DegU-phosphate stability                                    | SigD                                                    |
| <i>rapI</i>          | + | 2,96 | Prophages & mobile genetic elements_ICEBs1             | Control of ICEBs1, ImmR antagonist; response regulator aspartate phosphatase                      | ComA (+) SigH                                           |
| <i>ligB</i>          | + | 2,96 | Prophages & mobile genetic elements_ICEBs1             | phage SP-beta replication_DNA ligase                                                              | U                                                       |
| <i>int</i>           | + | 3,32 | Prophages & mobile genetic elements_ICEBs1             | Excision of the conjugative transposon ICEBs1; integrase                                          | U                                                       |
| <i>immA</i>          | + | 3,40 | Prophages & mobile genetic elements_ICEBs1             | control of ImmR activity; site-specific protease                                                  | U                                                       |
| <i>ydcO</i>          | + | 3,42 | Prophages & mobile genetic elements_ICEBs1             | U                                                                                                 | ImmR (-)                                                |
| <i>xis</i>           | + | 3,54 | Prophages & mobile genetic elements_ICEBs1             | Excision of the conjugative transposon ICEBs1; excisionase                                        | ImmR (-)                                                |
| <i>ydcP</i>          | + | 3,83 | Prophages & mobile genetic elements_ICEBs1             | Conjugation and replication of ICEBs1; helicase processivity factor                               | ImmR (-)                                                |
| <i>immR</i>          | + | 3,86 | Prophages & mobile genetic elements_ICEBs1             | Control of transfer of the mobile genetic element ICEBs1; Transcriptional repressor               | U                                                       |
| <i>xre</i>           | + | 3,83 | Prophages & mobile genetic elements_PBSX prophage      | regulation of PBSX prophage gene expression; Transcriptional repressor                            | U                                                       |
| <i>ybzH</i>          | + | 3,84 | Prophages & mobile genetic elements_Prophage 1         | unknown; putative transcriptional regulator                                                       | U                                                       |
| <i>yqaS</i>          | + | 2,78 | Prophages & mobile genetic elements_Skin element       | unknown; similar to terminase                                                                     | SigD                                                    |
| <i>sknR</i>          | + | 3,04 | Prophages & mobile genetic elements_Skin element       | repression of yqaF operon of the skin element; transcriptional repressor (Xre family)             | U                                                       |
| <i>yqbC</i>          | + | 3,68 | Prophages & mobile genetic elements_Skin element       | U                                                                                                 | U                                                       |
| <i>yqbG</i>          | + | 4,94 | Prophages & mobile genetic elements_Skin element       | U                                                                                                 | U                                                       |
| <i>yoyH</i>          | + | 2,34 | Prophages & mobile genetic elements_SP-beta prophage   | U                                                                                                 | U                                                       |
| <i>yoqL</i>          | + | 2,49 | Prophages & mobile genetic elements_SP-beta prophage   | U                                                                                                 | U                                                       |
| <i>yomO</i>          | + | 2,49 | Prophages & mobile genetic elements_SP-beta prophage   | U                                                                                                 | U                                                       |
| <i>yorS</i>          | + | 2,54 | Prophages & mobile genetic elements_SP-beta prophage   | U                                                                                                 | U                                                       |
| <i>yotM</i>          | + | 2,56 | Prophages & mobile genetic elements_SP-beta prophage   | U                                                                                                 | U                                                       |
| <i>yorB</i>          | + | 2,58 | Prophages & mobile genetic elements_SP-beta prophage   | U                                                                                                 | CsoR (-) SigE/K                                         |
| <i>yorE</i>          | + | 2,61 | Prophages & mobile genetic elements_SP-beta prophage   | U                                                                                                 | LexA (-)                                                |
| <i>yorM</i>          | + | 2,64 | Prophages & mobile genetic elements_SP-beta prophage   | U                                                                                                 | U                                                       |
| <i>yosT</i>          | + | 2,70 | Prophages & mobile genetic elements_SP-beta prophage   | U                                                                                                 | U                                                       |
| <i>yonT</i>          | + | 2,72 | Prophages & mobile genetic elements_SP-beta prophage   | toxin                                                                                             | as-yonT                                                 |
| <i>yopC</i>          | + | 2,72 | Prophages & mobile genetic elements_SP-beta prophage   | U                                                                                                 | U                                                       |
| <i>yorJ</i>          | + | 2,78 | Prophages & mobile genetic elements_SP-beta prophage   | U                                                                                                 | U                                                       |
| <i>yonV</i>          | + | 2,82 | Prophages & mobile genetic elements_SP-beta prophage   | U                                                                                                 | U                                                       |
| <i>yopK</i>          | + | 2,99 | Prophages & mobile genetic elements_SP-beta prophage   | U                                                                                                 | U                                                       |
| <i>yopQ</i>          | + | 3,04 | Prophages & mobile genetic elements_SP-beta prophage   | U                                                                                                 | U                                                       |
| <i>yopA</i>          | + | 3,08 | Prophages & mobile genetic elements_SP-beta prophage   | U                                                                                                 | U                                                       |
| <i>yopE</i>          | + | 3,10 | Prophages & mobile genetic elements_SP-beta prophage   | U                                                                                                 | U                                                       |
| <i>yonI</i>          | + | 3,14 | Prophages & mobile genetic elements_SP-beta prophage   | U                                                                                                 | U                                                       |
| <i>yopP</i>          | + | 3,17 | Prophages & mobile genetic elements_SP-beta prophage   | U                                                                                                 | U                                                       |
| <i>yoyJ</i>          | + | 3,26 | Prophages & mobile genetic elements_SP-beta prophage   | U                                                                                                 | U                                                       |
| <i>yopR</i>          | + | 3,26 | Prophages & mobile genetic elements_SP-beta prophage   | U                                                                                                 | U                                                       |
| <i>yokB</i>          | + | 3,47 | Prophages & mobile genetic elements_SP-beta prophage   | U                                                                                                 | U                                                       |
| <i>yopM</i>          | + | 3,52 | Prophages & mobile genetic elements_SP-beta prophage   | U                                                                                                 | U                                                       |
| <i>yorC</i>          | + | 3,54 | Prophages & mobile genetic elements_SP-beta prophage   | U                                                                                                 | LexA (-)                                                |

|              |   |      |                                                                |                                                                                                          |          |                   |
|--------------|---|------|----------------------------------------------------------------|----------------------------------------------------------------------------------------------------------|----------|-------------------|
| <i>yokC</i>  | + | 3,72 | Prophages & mobile genetic elements_SP-beta prophage           | U                                                                                                        | U        |                   |
| <i>yoyI</i>  | + | 3,72 | Prophages & mobile genetic elements_SP-beta prophage           | U                                                                                                        | U        |                   |
| <i>yopN</i>  | + | 3,73 | Prophages & mobile genetic elements_SP-beta prophage           | U                                                                                                        | U        |                   |
| <i>yotE</i>  | + | 3,75 | Prophages & mobile genetic elements_SP-beta prophage           | U                                                                                                        | CsoR (-) | SigE/K            |
| <i>yopO</i>  | + | 4,12 | Prophages & mobile genetic elements_SP-beta prophage           | similar to transcriptional regulator (Xre family)                                                        | U        |                   |
| <i>yonsS</i> | + | 4,23 | Prophages & mobile genetic elements_SP-beta prophage           | U                                                                                                        | U        |                   |
| <i>yotD</i>  | + | 4,25 | Prophages & mobile genetic elements_SP-beta prophage           | Unknown; similar to acyl-coA synthetase                                                                  | CsoR (-) | SigE/K            |
| <i>yopF</i>  | + | 4,33 | Prophages & mobile genetic elements_SP-beta prophage           | U                                                                                                        | U        |                   |
| <i>yonR</i>  | + | 5,29 | Prophages & mobile genetic elements_SP-beta prophage           | Similar to transcriptional regulator (Xre family)                                                        | U        |                   |
| <i>bhlB</i>  | + | 6,45 | Prophages & mobile genetic elements_SP-beta prophage           | U                                                                                                        | U        |                   |
| <i>yosU</i>  | + | 8,08 | Prophages & mobile genetic elements_SP-beta prophage           | U                                                                                                        | U        |                   |
| <i>dps</i>   | + | 3,21 | stress response                                                | Fe storage and stress resistance; miniferritin                                                           | SigB     |                   |
| <i>SRS</i>   | + | 3,99 | stress response_Anti-toxin                                     | contro of BsrE toxin expression; Antisense RNA to bsrE                                                   | U        |                   |
| <i>ydjO</i>  | + | 3,09 | stress response_cell envelope stress resistance                | U                                                                                                        | SigW     | SigE              |
| <i>mgsR</i>  | + | 2,86 | Stress response_oxydative stress resistance                    | Transcriptional regulator of a subset of the SigB general stress regulon; protection vs oxidative stress | SigB     | MgsR (+)          |
| <i>yydJ</i>  | + | 3,00 | Stress response_resistance to antimicrobials                   | control of LiaR-LiaS activity; putative ABC transporter (ATP-binding)                                    | AbrB (-) | Rok (-)           |
| <i>sixX</i>  | + | 3,07 | Stress response_Resistance to antimicrobials                   | Resistance to cationic antimicrobial peptides; RNA polymerase ECF-type sigma factor                      | SigX     | YvrbH (+)         |
| <i>yydI</i>  | + | 3,86 | Stress response_resistance to antimicrobials                   | control of LiaR-LiaS activity; putative ABC transporter (permease)                                       | AbrB (-) | Rok (-)           |
| <i>yydG</i>  | + | 4,50 | Stress response_resistance to antimicrobials                   | control of LiaR-LiaS activity; oxidoreductase                                                            | AbrB (-) | Rok (-)           |
| <i>yydH</i>  | + | 4,86 | Stress response_resistance to antimicrobials                   | control of LiaR-LiaS activity; putative ABC transporter                                                  | AbrB (-) | Rok (-)           |
| <i>yobK</i>  | + | 2,48 | Stress response_toxins, antitoxins and immunity against toxins | antitoxin, inhibition of the cytotoxic activity of YobL                                                  | U        |                   |
| <i>yobL</i>  | + | 2,78 | Stress response_toxins, antitoxins and immunity against toxins | Toxin                                                                                                    | U        |                   |
| <i>yxxD</i>  | + | 2,92 | Stress response_toxins, antitoxins and immunity against toxins | Antitoxin; inhibition of cytotoxic YxiD                                                                  | U        |                   |
| <i>sdpI</i>  | + | 3,02 | Stress response_toxins, antitoxins and immunity against toxins | protection against SdpC toxin                                                                            | AbrB (-) | SdpR (-)          |
| <i>sdpA</i>  | + | 5,21 | Stress response_toxins, antitoxins and immunity against toxins | maturation of SdpC toxin                                                                                 | AbrB (-) | Rok (-) Spo0A (+) |
| <i>ywnA</i>  | + | 2,29 | U                                                              | U                                                                                                        | U        |                   |
| <i>yvkN</i>  | + | 2,33 | U                                                              | U                                                                                                        | U        |                   |
| <i>yrkD</i>  | + | 2,53 | U                                                              | U                                                                                                        | U        |                   |
| <i>yubF</i>  | + | 2,54 | U                                                              | U                                                                                                        | U        |                   |
| <i>yceK</i>  | + | 2,56 | U                                                              | unknown; putative transcriptional regulator                                                              | U        |                   |
| <i>yozV</i>  | + | 2,58 | U                                                              | U                                                                                                        | U        |                   |
| <i>yurQ</i>  | + | 2,60 | U                                                              | U                                                                                                        | U        |                   |
| <i>ypbS</i>  | + | 2,60 | U                                                              | U                                                                                                        | U        |                   |
| <i>ynaB</i>  | + | 2,63 | U                                                              | U                                                                                                        | U        |                   |
| <i>ykvN</i>  | + | 2,64 | U                                                              | Unknown; MarR family transcription regulator                                                             | U        |                   |
| <i>yfnC</i>  | + | 2,65 | U                                                              | unknown; similar to fosmidmycin resistance protein                                                       | U        |                   |
| <i>ycxB</i>  | + | 2,67 | U                                                              | U                                                                                                        | U        |                   |
| <i>yqzF</i>  | + | 2,68 | U                                                              | U                                                                                                        | U        |                   |
| <i>ydel</i>  | + | 2,70 | U                                                              | U                                                                                                        | U        |                   |
| <i>ywpF</i>  | + | 2,70 | U                                                              | U                                                                                                        | U        |                   |
| <i>ybfF</i>  | + | 2,70 | U                                                              | U                                                                                                        | U        |                   |
| <i>yqgW</i>  | + | 2,71 | U                                                              | U                                                                                                        | U        |                   |
| <i>yrdC</i>  | + | 2,78 | U                                                              | U                                                                                                        | U        |                   |
| <i>yydD</i>  | + | 2,80 | U                                                              | U                                                                                                        | U        |                   |
| <i>yoeC</i>  | + | 2,81 | U                                                              | U                                                                                                        | U        |                   |
| <i>yfzA</i>  | + | 2,96 | U                                                              | U                                                                                                        | U        |                   |
| <i>yezA</i>  | + | 2,96 | U                                                              | U                                                                                                        | U        |                   |
| <i>yjfB</i>  | + | 2,97 | U                                                              | U                                                                                                        | SigD     |                   |
| <i>ypoP</i>  | + | 3,00 | U                                                              | Similar to transcriptional regulator (MarR family)                                                       | U        |                   |
| <i>yqkE</i>  | + | 3,03 | U                                                              | U                                                                                                        | U        |                   |
| <i>yraH</i>  | + | 3,05 | U                                                              | U                                                                                                        | U        |                   |
| <i>pbuO</i>  | + | 3,06 | U                                                              | unknown; similar to permease PbuG                                                                        | PurR (-) |                   |
| <i>yncB</i>  | + | 3,16 | U                                                              | U                                                                                                        | U        |                   |
| <i>ydeB</i>  | + | 3,26 | U                                                              | unknown; putative transcriptional regulator                                                              | U        |                   |
| <i>yeeD</i>  | + | 3,27 | U                                                              | U                                                                                                        | U        |                   |
| <i>yaaC</i>  | + | 3,28 | U                                                              | putative sporulation protein                                                                             | U        |                   |
| <i>ydfL</i>  | + | 3,30 | U                                                              | unknown; similar to multidrug efflux transporter regulator of MreR family                                | U        |                   |
| <i>ybfE</i>  | + | 3,33 | U                                                              | U                                                                                                        | U        |                   |
| <i>yIbN</i>  | + | 3,39 | U                                                              | may be required for accumulation of 23S rRNA                                                             | U        |                   |
| <i>yybN</i>  | + | 3,40 | U                                                              | U                                                                                                        | Rok (-)  | DnaA (-)          |
| <i>yxcC</i>  | + | 3,43 | U                                                              | U                                                                                                        | SigD     | TnrA (+)          |
| <i>ynaE</i>  | + | 3,49 | U                                                              | U                                                                                                        | U        |                   |
| <i>yxaC</i>  | + | 3,50 | U                                                              | Holin-like auxiliary protein                                                                             | U        |                   |
| <i>yrzM</i>  | + | 3,53 | U                                                              | U                                                                                                        | U        |                   |
| <i>ykzT</i>  | + | 3,57 | U                                                              | U                                                                                                        | U        |                   |
| <i>ykvsS</i> | + | 3,57 | U                                                              | U                                                                                                        | U        |                   |
| <i>yjiA</i>  | + | 3,57 | U                                                              | U                                                                                                        | U        |                   |
| <i>ypzI</i>  | + | 3,61 | U                                                              | U                                                                                                        | U        |                   |
| <i>yjzD</i>  | + | 3,62 | U                                                              | U                                                                                                        | U        |                   |

|             |   |       |                                                         |                                                   |           |           |
|-------------|---|-------|---------------------------------------------------------|---------------------------------------------------|-----------|-----------|
| <i>yybM</i> | + | 3,66  | U                                                       | U                                                 | Rok (-)   | DnaA (-)  |
| <i>ymzD</i> | + | 3,68  | U                                                       | U                                                 | U         |           |
| <i>yoyA</i> | + | 3,68  | U                                                       | U                                                 | U         |           |
| <i>yobD</i> | + | 3,69  | U                                                       | similar to transcriptional regulator (Xre family) | U         |           |
| <i>yneF</i> | + | 3,73  | U                                                       | U                                                 | Spo0A (+) |           |
| <i>yddK</i> | + | 3,76  | U                                                       | U                                                 | U         |           |
| <i>yugI</i> | + | 3,81  | U                                                       | U                                                 | RelA      |           |
| <i>yybL</i> | + | 3,82  | U                                                       | similar to ABC transporter (permease)             | Rok (-)   | DnaA (-)  |
| <i>yozF</i> | + | 3,87  | U                                                       | U                                                 | U         |           |
| <i>ybeF</i> | + | 3,90  | U                                                       | putative sporulation protein                      | U         |           |
| <i>ygzA</i> | + | 4,10  | U                                                       | U                                                 | U         |           |
| <i>yaaQ</i> | + | 4,16  | U                                                       | U                                                 | U         |           |
| <i>ydzP</i> | + | 4,22  | U                                                       | U                                                 | U         |           |
| <i>yxIA</i> | + | 4,32  | U                                                       | similar to purine-cytosine permease               | U         |           |
| <i>yjzI</i> | + | 4,47  | U                                                       | U                                                 | U         |           |
| <i>yabE</i> | + | 4,50  | U                                                       | unknown; Similar to CW binding prot               | sRNA(-)   |           |
| <i>ykbB</i> | + | 4,99  | U                                                       | U                                                 | TnrA (+)  | PhoP (+)  |
| <i>yocC</i> | + | 5,47  | U                                                       | U                                                 | U         |           |
| <i>yozH</i> | + | 5,77  | U                                                       | U                                                 | U         |           |
| <i>ykoL</i> | + | 6,46  | U                                                       | U                                                 | PhoP (+)  | TnrA (+)  |
| <i>ydcG</i> | + | 17,56 | U                                                       | U                                                 | U         |           |
| <i>ydcF</i> | + | 71,73 | U                                                       | U                                                 | U         |           |
| <i>yvzA</i> | + | 2,72  | U (put based on regulation: lifestyle_transition state) | U                                                 | AbrB (-)  | DegU (+)  |
| <i>yfml</i> | + | 2,74  | U (put based on regulation: lifestyle_transition state) | unknown, similar to macrolide-efflux transporter  | AbrB (-)  | Spo0A (+) |
| <i>ydeH</i> | + | 2,89  | U (put based on regulation: lifestyle_transition state) | U                                                 | AbrB (-)  |           |
| <i>yvnA</i> | + | 2,97  | U (put based on regulation: lifestyle_transition state) | U                                                 | AbrB (-)  | CcpA (-)  |
| <i>yjcM</i> | + | 3,91  | U (put based on regulation: lifestyle_transition state) | U                                                 | AbrB (-)  | SigD      |
| <i>yjdG</i> | + | 4,87  | U (put based on regulation: lifestyle_transition state) | U                                                 | AbrB (-)  |           |
| <i>yoZL</i> | + | 14,32 | U                                                       | U                                                 | LexA (-)  |           |
